# Supplementary material for: The Impact of Liver Abscesses on Performance and Carcass Traits in Beef Cattle: A Meta-Analysis Study
Source: MDPI journal article supplement (doi:10.3390/ruminants4010005), 2024-02-12
Supplement: s1 [file s1]

Dry Matter intake (kg/day)

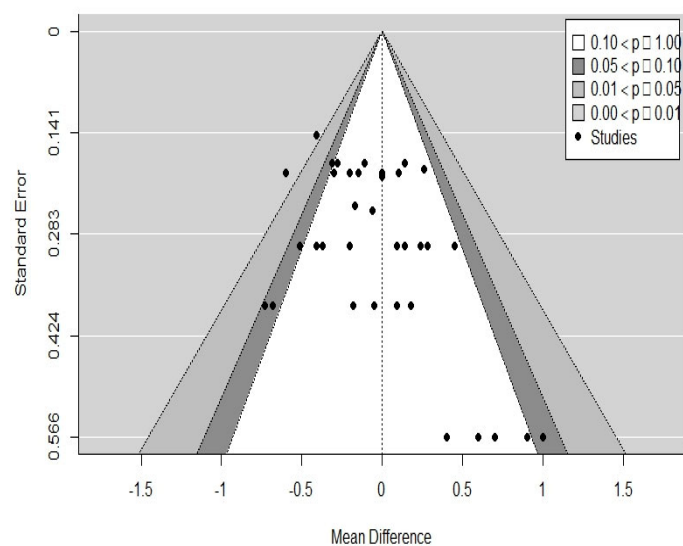

Final body weight (kg)

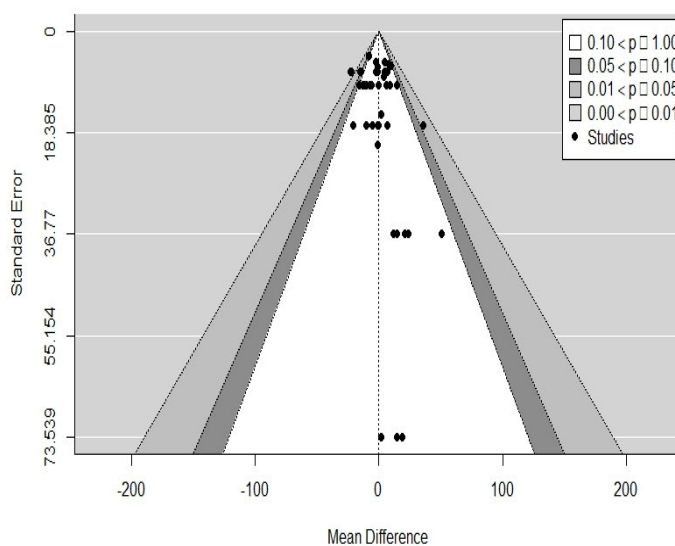

Average daily gain (kg/day)

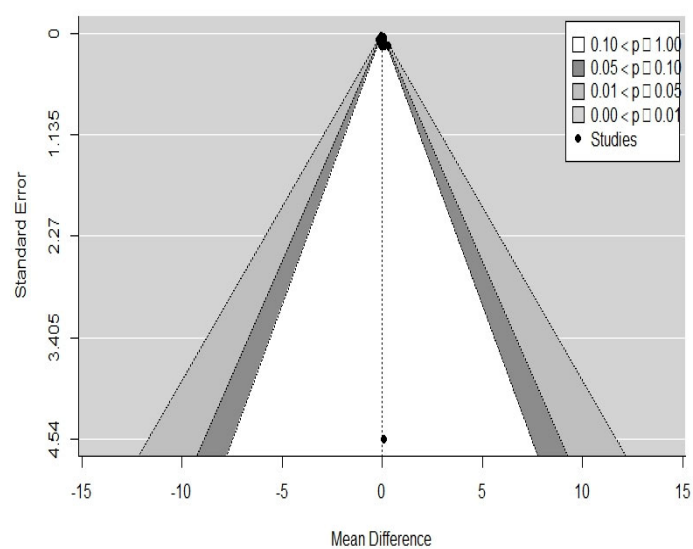

Feed efficiency (kg/kg)

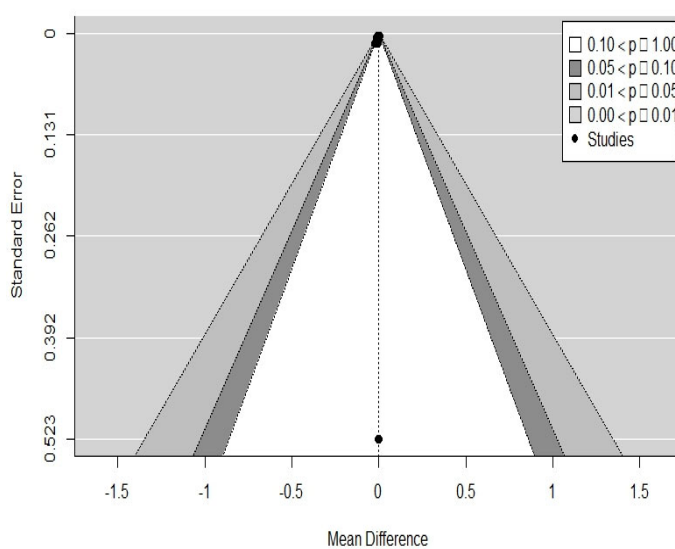

Carcass weight (kg)

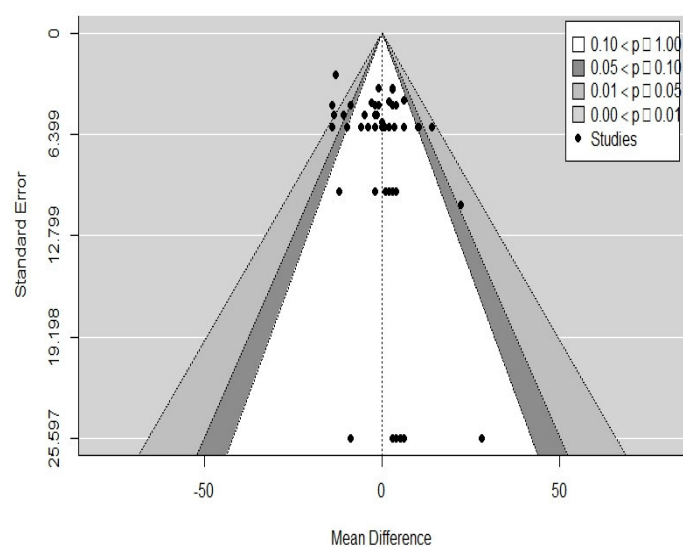

Carcass dressing (%)

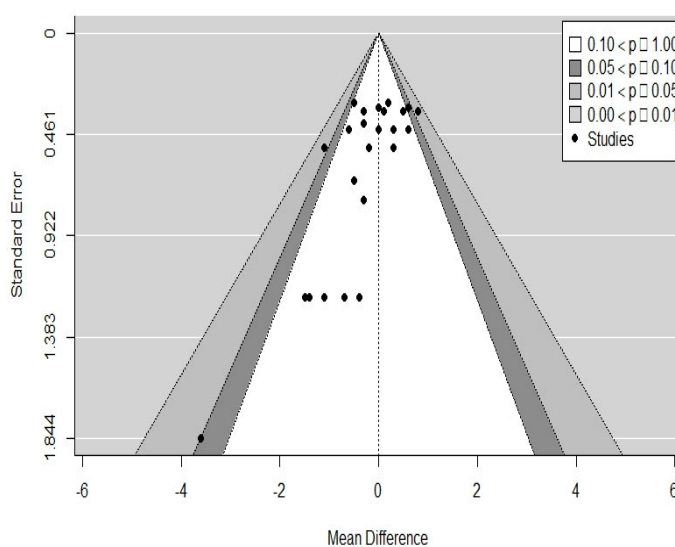

Ribeye area (cm<sup>2</sup>)

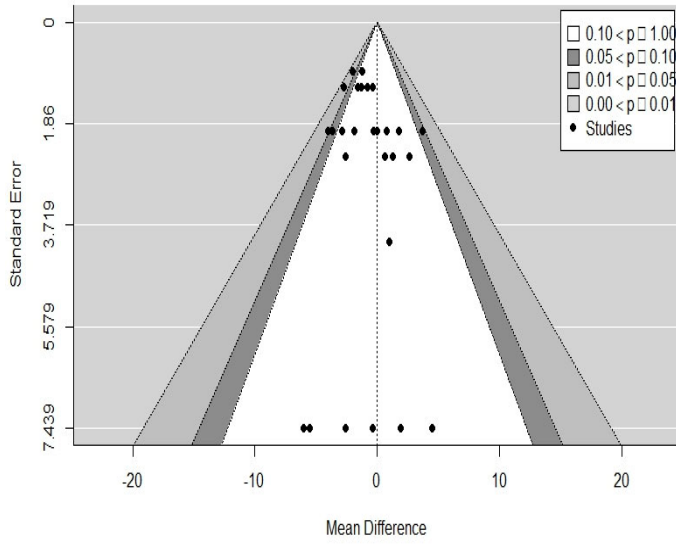

Subcutaneous fat thickness (mm)

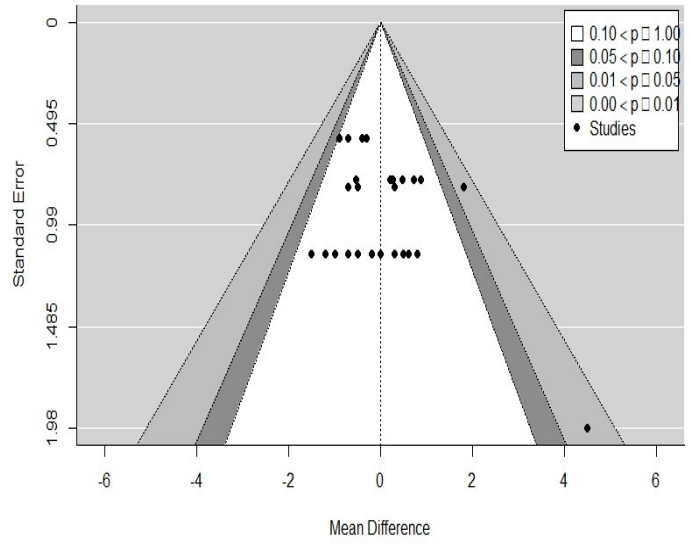

Kidney, pelvic and heart fat (%)

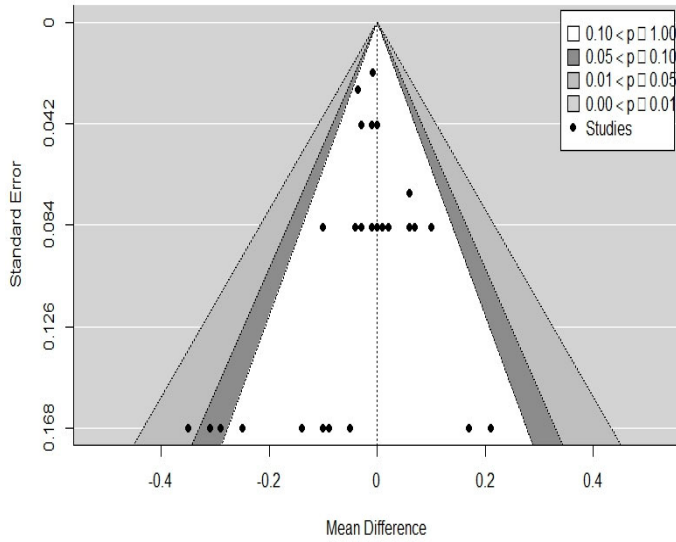

USDA calculated yield grade

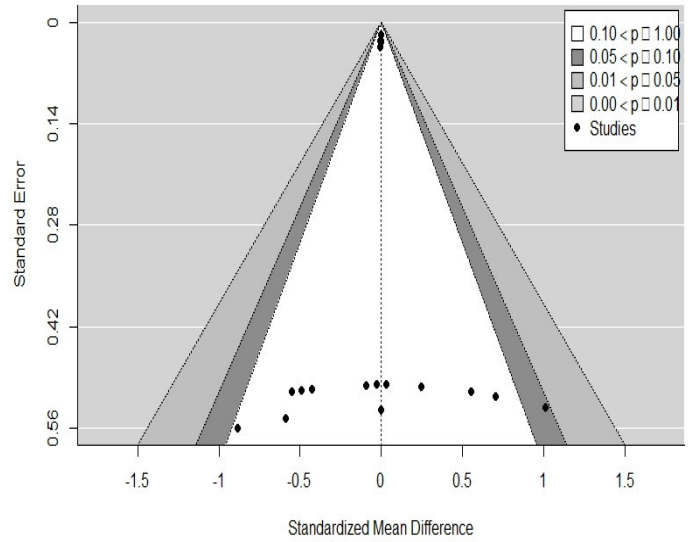

Marbling score

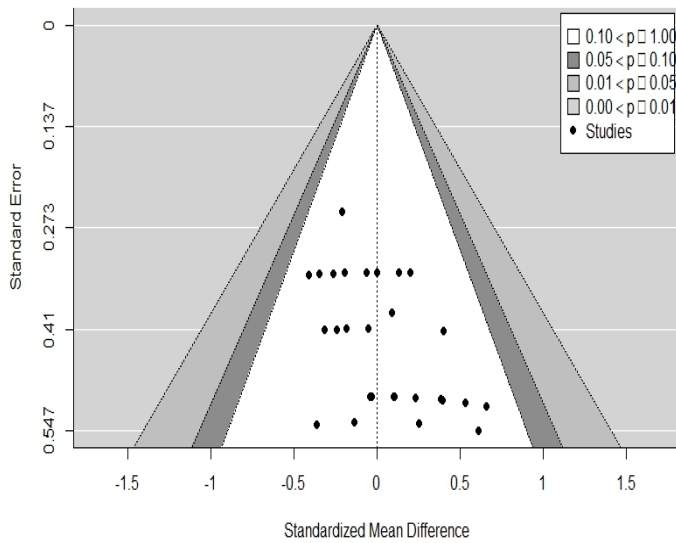

**Figure S1.** Funnel plots—The horizontal line indicates the weighting mean difference (WMD) or Standard mean difference (SMD) estimate and the vertical line indicates their corresponding standard errors (SE). *p*-value refers to the test for funnel plot asymmetry by Egger's regression method between WMD and SE. Funnel plot asymmetry is indicative of publication bias.
